# Supplementary material for: A Survey on Cell wall Proteins of C. Sinensis Leaf by Combining Cell Wall Proteomic and N-Glycoproteomic Strategy
Source: Research Square preprint supplement (doi:10.21203/rs.3.rs-132373/v1), 2020-12-23
Supplement: Supplementary file 1 [file 2eb7c683a504bf83b84cd7eb.xlsx]

## Sheet: Site_quant
Table 2 Identified N-glycoproteins in the leaves of C. sinensis.
Protein accession	Position	Amino acid	Protein description	Gene name	Localization probability	PEP	Score	Modified sequence	Charge	Mass error [ppm]	MS/MS Count	A1_1	A1_2	A1_3
CSS000063.1_CSS000063	226	N	PREDICTED: serine carboxypeptidase-like 34 [Nicotiana sylvestris]	---	1	2.01311e-06	115.1	ADVQQALHAN(1)VTK	3	0.43256	9	0.893	0.909	0.896
CSS000415.1_CSS000415	508	N	PREDICTED: alpha-glucosidase-like [Vitis vinifera]	---	0.999741	7.64357e-12	155.37	IN(1)NSGGQR	2	-0.34971	8	0.805	0.808	0.814
CSS000639.1_CSS000639	245	N	PREDICTED: probable LRR receptor-like serine/threonine-protein kinase At1g56140 isoform X1 [Vitis vinifera]	---	1	1.65003e-17	150.05	ISDLSN(1)SSSSLEFLK	3	-0.15666	2	0.959	1.036	0.937
CSS000718.1_CSS000718	165	N	PREDICTED: probable glutamate carboxypeptidase 2 isoform X1 [Citrus sinensis]	---	1	3.25166e-05	70.373	EMGVN(1)MSGTVALAK	3	0.52507	3	1.016	0.944	1.055
CSS000782.1_CSS000782	274	N	PREDICTED: kynurenine formamidase isoform X1 [Solanum tuberosum]	---	1	6.7966e-07	153.81	N(1)GSDYNFSIMK	2	0.5686	16	0.973	0.959	0.98
CSS000782.1_CSS000782	332	N	PREDICTED: kynurenine formamidase isoform X1 [Solanum tuberosum]	---	1	0.000101858	113.24	N(1)ITADVMK	2	-0.41333	22	1.011	0.96	0.94
CSS000782.1_CSS000782	111	N	PREDICTED: kynurenine formamidase isoform X1 [Solanum tuberosum]	---	0.999968	0.00163008	73.927	N(1)GSLANNSEMK	2	0.24812	6	0.94	0.963	0.928
CSS000810.1_CSS000810	98	N	PREDICTED: probably inactive leucine-rich repeat receptor-like protein kinase At5g48380 [Sesamum indicum]	---	1	2.62369e-21	159.95	GGFPLGLQN(1)CTALTGLDLSSNK	3	0.53514	1	0.982	1.092	0.987
CSS001804.1_CSS001804	152	N	PREDICTED: serine carboxypeptidase-like 18 isoform X2 [Juglans regia]	---	1	1.91138e-05	113.67	TSAGYN(1)TSDTK	3	1.1589	2	0.997	0.874	0.871
CSS002310.1_CSS002310	96	N	PREDICTED: prosaposin isoform X2 [Jatropha curcas]	---	1	0.000921197	125.75	AIEYLEDN(1)K	2	-0.63599	1	1.055	0.988	1.028
CSS002844.1_CSS002844	452	N	PREDICTED: alpha-xylosidase 1-like [Juglans regia]	---	1	2.35314e-09	137.8	IN(1)ASGLQVPIGYK	3	0.65545	5	0.873	0.866	0.867
CSS002844.1_CSS002844	108	N	PREDICTED: alpha-xylosidase 1-like [Juglans regia]	---	1	2.05977e-27	166.21	SNGQTLFN(1)SSSDQSDPYGDLVFK	3	-0.53717	17	0.93	0.934	0.946
CSS002849.1_CSS002849	146	N	PREDICTED: pathogenesis-related protein 5-like isoform X2 [Nicotiana tabacum]	---	1	0.0150707	51.771	GN(1)CSVAGCESDLR	2	3.0571	1
CSS003241.1_CSS003241	221	N	PREDICTED: endoglucanase/exoglucanase B [Gossypium arboreum]	---	1	0.00844995	74.2	N(1)SSFLER	2	0.24883	1
CSS003447.1_CSS003447	72	N	PREDICTED: PI-PLC X domain-containing protein At5g67130 [Arachis duranensis]	---	1	2.88584e-13	183.33	LVN(1)N(1)SLPFNK	2	-0.47914	6	1.069	1.059	1.057
CSS003447.1_CSS003447	73	N	PREDICTED: PI-PLC X domain-containing protein At5g67130 [Arachis duranensis]	---	0.999999	0.000335055	96.229	LVN(1)N(1)SLPFNK	2	-0.47914	2	1.042	1.08	1.065
CSS003447.1_CSS003447	111	N	PREDICTED: PI-PLC X domain-containing protein At5g67130 [Arachis duranensis]	---	1	7.54087e-122	258.14	VTITNQEDN(1)ITQQLNNGVR	3	-0.20253	16	1.036	1.044	1.054
CSS003526.1_CSS003526	68	N	PREDICTED: cysteine-rich receptor-like protein kinase 25 [Gossypium arboreum]	---	0.99993	7.99979e-05	99.927	STSINGFYN(1)YTVGLK	3	-0.85493	3	1.079	1.125	1.042
CSS003646.1_CSS003646	472	N	PREDICTED: aspartic proteinase-like isoform X1 [Juglans regia]	---	1	1.31479e-06	136.01	LPN(1)VTFTIGSK	2	-0.1394	2	1	0.996	0.981
CSS004256.1_CSS004256	90	N	PREDICTED: alpha-amylase-like isoform X1 [Solanum tuberosum]	---	1	3.32969e-08	135.09	LYDLN(1)ASHYGNEFELK	3	0.54302	2	0.905	0.894	0.833
CSS004762.1_CSS004762	272	N	PREDICTED: zinc finger CCCH domain-containing protein 61-like [Nicotiana tabacum]	---	1	0.0115652	52.867	GMPN(1)AVVGR	2	4.1176	1	1.08	0.955	1.167
CSS004861.1_CSS004861	457	N	hydroxyproline-rich glycoprotein [Populus trichocarpa]	---	1	0.00463423	72.928	YEN(1)IFRN(1)EK	2	0.4289	4	0.886	0.885	0.876
CSS004861.1_CSS004861	453	N	hydroxyproline-rich glycoprotein [Populus trichocarpa]	---	1	0.00463423	72.928	YEN(1)IFRN(1)EK	2	0.4289	4	0.886	0.885	0.876
CSS004877.1_CSS004877	129	N	PREDICTED: GDSL esterase/lipase At5g45960-like [Nelumbo nucifera]	---	1	5.6023e-06	96.673	SN(1)ATSMLDQLEEFK	3	-0.80986	1	1.269	1.181	1.23
CSS005173.1_CSS005173	56	N	PREDICTED: calreticulin isoform X1 [Nicotiana sylvestris]	---	1	0.000774544	74.962	MAGEWN(1)YTSGK	2	1.0086	4	1.048	1.011	1.051
CSS005376.1_CSS005376	274	N	PREDICTED: 26S proteasome non-ATPase regulatory subunit 4 homolog [Vitis vinifera]	---	0.998941	7.91364e-07	44.6	GGEQQSTSQDATMTEN(0.999)VSVAAPEAEN(0.001)K	3	2.5723	1
CSS005381.1_CSS005381	279	N	PREDICTED: alpha-mannosidase [Juglans regia]	---	1	4.34938e-05	118.75	VNDFINAAITQAN(1)VTR	3	-0.99118	1
CSS005672.1_CSS005672	69	N	inositol-1,4,5-trisphosphate 5-phosphatase [Arabidopsis thaliana]	---	0.999799	2.84109e-17	195.05	FFENN(1)SSR	2	-0.059637	2	0.876	0.898	0.917
CSS006185.1_CSS006185	243	N	PREDICTED: protein DEFECTIVE IN EXINE FORMATION 1 [Erythranthe guttata]	---	1	6.65255e-10	136.24	FN(1)DSQVDAGIK	3	1.3961	2	0.924	0.947	0.931
CSS006401.1_CSS006401	646	N	PREDICTED: peptide-N4-(N-acetyl-beta-glucosaminyl)asparagine amidase A-like [Nicotiana tabacum]	---	1	4.69546e-13	164.2	FVTSSN(1)YTILYDK	3	-0.038209	2	0.925	0.871	0.862
CSS006530.1_CSS006530	397	N	PREDICTED: protein disulfide-isomerase [Vitis vinifera]	---	1	1.11664e-08	74.853	VVVADSLHDMVFN(1)SGK	3	-1.2793	1
CSS006530.1_CSS006530	45	N	PREDICTED: protein disulfide-isomerase [Vitis vinifera]	---	0.999998	1.40397e-35	193.77	EFVLTLDNSN(1)FSDTVGK	3	0.34393	8	0.893	0.866	0.885
CSS006530.1_CSS006530	184	N	PREDICTED: protein disulfide-isomerase [Vitis vinifera]	---	1	1.74757e-05	156.14	YEN(1)FTAVAEK	3	0.41078	14	0.895	0.877	0.869
CSS006587.1_CSS006587	164	N	PREDICTED: peroxidase 15-like [Prunus mume]	---	1	6.88413e-24	178.03	AGTTGLPLFN(1)ESLNVLK	3	1.3958	1	1.088	1.081	1.087
CSS006732.1_CSS006732	67	N	plant/F17O14-7 protein [Medicago truncatula]	---	0.878383	0.000718134	50.202	TGIPFDGVVPSN(0.122)PGIN(0.878)ISAMR	3	-0.53075	1	0.786	0.993	0.869
CSS006732.1_CSS006732	145	N	plant/F17O14-7 protein [Medicago truncatula]	---	1	0.00305928	155.42	N(1)LSELDIR	2	0.28952	1	0.765	0.817	0.762
CSS006732.1_CSS006732	164	N	plant/F17O14-7 protein [Medicago truncatula]	---	0.999566	0.00210563	71.279	FSN(1)VTLVPNGSVAK	3	-0.47724	1	0.754	0.849	0.791
CSS007274.1_CSS007274	149	N	PREDICTED: vacuolar-sorting receptor 3-like [Juglans regia]	---	1	2.70014e-05	84.753	YIEN(1)ITIPSALIEK	3	-0.2155	1	0.989	0.999	0.969
CSS007356.1_CSS007356	586	N	PREDICTED: microtubule-associated protein 70-5 isoform X2 [Pyrus x bretschneideri]	---	1	0.018898	41.164	N(1)HLEDTIGETK	3	2.5929	1	0.785	0.908	0.885
CSS007380.1_CSS007380	51	N	uncharacterized LOC8278573 precursor [Ricinus communis]	---	1	3.22222e-09	96.229	PSDLN(1)GTVVLK	3	0.7215	1
CSS007392.1_CSS007392	259	N	PREDICTED: farnesylcysteine lyase [Theobroma cacao]	---	1	0.00258759	116.73	LLN(1)LTVK	2	0.23936	1	0.977	0.941	0.911
CSS007403.1_CSS007403	297	N	PREDICTED: probable LRR receptor-like serine/threonine-protein kinase At4g08850 [Prunus mume]	---	1	0.0147718	97.431	SFGN(1)LTK	2	-0.064344	1	0.882	0.858	0.867
CSS007403.1_CSS007403	176	N	PREDICTED: probable LRR receptor-like serine/threonine-protein kinase At4g08850 [Prunus mume]	---	1	7.02826e-07	79.837	FSGPIPSSISN(1)LTQLGQLK	3	1.0393	1
CSS007488.1_CSS007488	453	N	PREDICTED: aconitate hydratase, cytoplasmic [Ipomoea nil]	---	0.855787	4.87024e-05	80.632	AN(0.856)N(0.144)MFVDYNEPQQQR	3	-0.0064737	1
CSS007566.1_CSS007566	455	N	PREDICTED: probable polygalacturonase [Vitis vinifera]	---	1	1.26107e-05	94.287	DVIAEN(1)VTMAAR	3	-0.066812	2	0.977	0.97	0.958
CSS007582.1_CSS007582	352	N	PREDICTED: aminoacylase-1-like [Juglans regia]	---	0.874756	0.000464208	43.37	PLMTPTN(0.875)DSN(0.125)PWWSVFK	3	-2.0468	1
CSS007582.1_CSS007582	328	N	PREDICTED: aminoacylase-1-like [Juglans regia]	---	1	0.0047251	67.334	N(1)MTYEIIEK	3	-0.81847	5	1.022	1.032	0.966
CSS007799.1_CSS007799	191	N	PREDICTED: probable glucan endo-1,3-beta-glucosidase A6 isoform X2 [Ziziphus jujuba]	---	1	7.30208e-08	130.72	SDISGPVMEPLLQFLN(1)R	3	0.19584	1	0.791	0.952	1.122
CSS007849.1_CSS007849	367	N	PREDICTED: probable inactive purple acid phosphatase 27 [Fragaria vesca subsp. vesca]	---	0.999999	1.84855e-08	103.31	DGSNEYNNYQPGSLN(1)TTDQLIK	3	-0.45431	2	1.019	0.938	0.949
CSS007849.1_CSS007849	135	N	PREDICTED: probable inactive purple acid phosphatase 27 [Fragaria vesca subsp. vesca]	---	1	1.08565e-06	149.69	YAN(1)ESSSDYTK	3	-0.64584	2	0.902	0.87	0.906
CSS007927.1_CSS007927	243	N	PREDICTED: probable LRR receptor-like serine/threonine-protein kinase At1g06840 [Jatropha curcas]	---	1	2.49254e-08	134.4	ELQLLTMN(1)LSGSLSPELGR	3	0.83036	2	1.17	1.088	1.056
CSS007973.1_CSS007973	58	N	PREDICTED: nectarin-1 [Eucalyptus grandis]	---	1	1.98362e-05	118.52	AN(1)FTATDFFFEGIAK	3	-0.54927	3	0.982	1.041	1.036
CSS008556.1_CSS008556	113	N	PREDICTED: probable inactive purple acid phosphatase 1 isoform X1 [Citrus sinensis]	---	0.99908	5.65625e-05	90.614	YQYAN(0.999)YAN(0.001)PEYK	3	0.12827	2	1.013	0.971	0.938
CSS008729.1_CSS008729	588	N	DPP6 N-terminal domain-like protein [Arabidopsis thaliana]	---	1	6.09618e-05	96.379	EKPGSGSFELYMVHPN(1)GTGLK	4	-1.1982	3	1.087	0.949	0.958
CSS008729.1_CSS008729	699	N	DPP6 N-terminal domain-like protein [Arabidopsis thaliana]	---	1	9.08373e-05	76.82	FPN(1)HSVEFAPYVSMK	3	-0.18669	2	1.111	1.043	1.111
CSS008754.1_CSS008754	131	N	PREDICTED: cysteine-rich receptor-like protein kinase 2 [Vitis vinifera]	---	1	4.98619e-19	163.44	AEN(1)YSFFDEFTGPQDR	2	-0.60563	2	1.174	1.208	1.154
CSS008786.1_CSS008786	174	N	PREDICTED: protein trichome birefringence-like 41 [Ipomoea nil]	---	0.999981	0.000148011	52.372	NMFLVDIVN(1)ETEGR	3	1.9672	3	0.989	1.125	1.029
CSS008807.1_CSS008807	192	N	PREDICTED: LRR receptor-like serine/threonine-protein kinase GSO1 isoform X2 [Juglans regia]	---	0.999065	0.000707999	81.263	IVDLSN(0.999)N(0.001)SVR	2	-0.5559	1	0.892	0.901	0.91
CSS008903.1_CSS008903	117	N	PREDICTED: putative disease resistance RPP13-like protein 1 isoform X1 [Vitis vinifera]	---	1	0.0117351	68.557	LSSMVPFN(1)LK	2	-1.2396	1	0.962	1.026	0.987
CSS009132.1_CSS009132	172	N	PREDICTED: aspartic proteinase Asp1 [Vitis vinifera]	---	1	4.28156e-10	164.92	DNLALN(1)FTNGIR	2	-0.4635	1	1.032	1.062	0.996
CSS009137.1_CSS009137	514	N	PREDICTED: beta-galactosidase 10 [Vitis vinifera]	---	1	4.36766e-05	118.87	NGFVDHIN(1)TTK	3	0.64599	5	0.992	0.94	0.964
CSS009137.1_CSS009137	570	N	PREDICTED: beta-galactosidase 10 [Vitis vinifera]	---	1	1.75341e-12	143.67	LQASASGN(1)GSVSPFK	2	-0.53334	2	0.917	0.913	0.898
CSS009277.1_CSS009277	118	N	PREDICTED: G-type lectin S-receptor-like serine/threonine-protein kinase RLK1 [Juglans regia]	---	1	3.93828e-05	143.7	LSETN(1)FSQGR	2	-0.12729	1	0.811	0.965	0.875
CSS009430.1_CSS009430	303	N	PREDICTED: pectin acetylesterase 8 [Vitis vinifera]	---	1	3.34399e-08	133.25	MEFLSALTGLGN(1)SSSR	3	0.0094036	1	0.878	1.04	1.068
CSS009672.1_CSS009672	160	N	PREDICTED: probable inactive purple acid phosphatase 2 [Citrus sinensis]	---	1	1.60898e-05	110.44	FNMPGN(1)SSEVTGTR	3	-0.56962	3	0.943	0.983	0.942
CSS009748.1_CSS009748	104	N	PREDICTED: Niemann-Pick C1 protein [Vitis vinifera]	---	0.999982	0.000108718	62.193	IQSLCPTITGN(1)VCCTETQFNTLR	3	0.25793	1
CSS009837.1_CSS009837	248	N	ribulose-1 (chloroplast) [Carpinus putoensis]	---	1	0.000562611	52.599	GHYLN(1)ATAGTCEEMMK	3	-0.19537	2	1.016	0.908	0.866
CSS009939.1_CSS009939	148	N	PREDICTED: pectinesterase-like [Juglans regia]	---	1	2.24893e-07	158.42	STISDLSSSN(1)K	3	-1.7105	3	1.034	1.065	1.053
CSS010022.1_CSS010022	306	N	PREDICTED: alpha-galactosidase 3 [Malus domestica]	---	1	9.27989e-09	127.79	N(1)MTAETFELLSNK	3	-0.21219	7	0.925	0.895	0.876
CSS010022.1_CSS010022	241	N	PREDICTED: alpha-galactosidase 3 [Malus domestica]	---	0.999985	1.01255e-08	50.752	TTDDIN(1)DSWASMTTIADLNDK	3	2.727	1
CSS010131.1_CSS010131	133	N	PREDICTED: cysteine-rich repeat secretory protein 12 [Ipomoea nil]	---	1	0.000358118	82.069	YDN(1)ISFLGVEDK	3	0.02032	1
CSS010875.1_CSS010875	515	N	PREDICTED: purple acid phosphatase 23 [Juglans regia]	---	0.999999	0.00070358	101.17	NQDIYKEN(1)SSGDQIYIVR	3	1.1112	1	0.924	0.879	0.959
CSS010967.1_CSS010967	507	N	Phospholipase C 4 [Morus notabilis]	---	1	5.44391e-05	127.03	AGAN(1)ESALVR	2	0.33366	1	0.998	0.965	0.94
CSS011359.1_CSS011359	79	N	PREDICTED: putative invertase inhibitor [Nicotiana tabacum]	---	0.95513	3.80752e-05	139.31	LIQN(0.045)N(0.955)VTDTR	2	-0.12215	1	0.904	0.963	1.029
CSS011402.1_CSS011402	403	N	PREDICTED: serine carboxypeptidase-like 51 [Populus euphratica]	---	1	0.00421156	118.74	TYLN(1)LSR	2	-0.18479	1	0.975	0.96	1.024
CSS011402.1_CSS011402	415	N	PREDICTED: serine carboxypeptidase-like 51 [Populus euphratica]	---	1	0.000438032	78.814	TPLFCGEDN(1)ITTK	3	0.44858	1	1.037	0.951	1.035
CSS011421.1_CSS011421	83	N	PREDICTED: probable trehalase [Juglans regia]	---	1	8.17018e-09	136.81	SN(1)LSITQNAFDDLPR	3	0.7193	1	0.967	1.004	0.966
CSS011758.1_CSS011758	201	N	PREDICTED: alpha-galactosidase [Populus euphratica]	---	1	0.000675902	161.28	DALN(1)ATGR	2	-0.25037	4	0.883	0.914	0.903
CSS011901.1_CSS011901	110	N	PREDICTED: cytochrome b561 and DOMON domain-containing protein At3g25290-like [Ipomoea nil]	---	1	0.00856046	123.16	TFN(1)ISSK	2	1.3028	1	0.874	0.833	0.851
CSS012380.1_CSS012380	368	N	group 1 family glycosyltransferase [Medicago truncatula]	---	1	0.00672401	121.29	IHQILN(1)K	3	0.16972	2	0.874	0.851	0.992
CSS012380.1_CSS012380	247	N	group 1 family glycosyltransferase [Medicago truncatula]	---	1	4.50156e-06	123.29	LYN(1)AADAFVLPSR	2	0.63387	1	1.024	0.997	0.933
CSS012555.1_CSS012555	411	N	PREDICTED: beta-glucosidase 11-like isoform X1 [Vitis vinifera]	---	1	0.021918	70.399	N(1)ATLSDPGR	2	-0.38817	1	0.891	0.9	0.914
CSS012635.1_CSS012635	192	N	PREDICTED: alpha-mannosidase I MNS4-like [Gossypium hirsutum]	---	1	6.67273e-08	141.34	LTN(1)DSVYEQVTK	2	0.071929	2	0.779	0.778	0.796
CSS012635.1_CSS012635	91	N	PREDICTED: alpha-mannosidase I MNS4-like [Gossypium hirsutum]	---	1	0.000192693	136.57	NLQFDIN(1)K	3	2.0663	2	0.793	0.787	0.802
CSS012851.1_CSS012851	84	N	PREDICTED: translocon-associated protein subunit beta [Vitis vinifera]	---	1	2.2718e-05	120.54	DIFDSVSGN(1)TSMSWER	3	-0.62202	3	0.991	1.028	0.981
CSS013068.1_CSS013068	407	N	PREDICTED: probable serine protease EDA2 [Theobroma cacao]	---	1	0.00313632	68.536	N(1)CSSPDAVHK	3	-0.25714	1	0.908	0.817	0.937
CSS013695.1_CSS013695	143	N	PREDICTED: protein YLS9-like [Juglans regia]	---	1	0.000181085	117.79	N(1)TTELGFVFK	2	0.0097234	1	0.877	0.91	0.948
CSS013917.1_CSS013917	343	N	PREDICTED: receptor-like protein kinase HSL1 [Ricinus communis]	---	0.937589	3.66759e-05	106.3	LTN(0.062)LN(0.938)LSSNQFSGK	3	0.10631	1	0.95	0.894	1.019
CSS014004.1_CSS014004	161	N	PREDICTED: photosystem I reaction center subunit II, chloroplastic-like [Juglans regia]	---	1	0.0156742	40.475	VFPN(1)GEVQYLHPK	3	0.34643	1	1.226	1.149	1.181
CSS014233.1_CSS014233	447	N	PREDICTED: monocopper oxidase-like protein SKU5 [Juglans regia]	---	0.986415	1.02381e-07	127.17	GFMEIILQN(0.014)N(0.986)ETK	3	-0.27954	2	0.832	0.877	0.932
CSS014233.1_CSS014233	203	N	PREDICTED: monocopper oxidase-like protein SKU5 [Juglans regia]	---	1	1.36581e-07	77.959	YN(1)TTLVPDGIDYETIDVHPGK	3	-0.31602	2	0.784	0.863	0.812
CSS014233.1_CSS014233	433	N	PREDICTED: monocopper oxidase-like protein SKU5 [Juglans regia]	---	1	3.55647e-06	124.04	METSVIN(1)GTYR	2	2.0005	4	0.868	0.85	0.881
CSS014357.1_CSS014357	363	N	PREDICTED: laccase-14 [Vitis vinifera]	---	0.998027	3.89698e-36	183.75	FPN(0.002)LPN(0.998)YTDIDAVTNFVR	3	0.26212	1	0.947	0.952	0.821
CSS014378.1_CSS014378	120	N	PREDICTED: farnesylcysteine lyase [Theobroma cacao]	---	1	0.00258759	116.73	FLN(1)LTVK	2	-0.77375	1	1.009	0.968	0.945
CSS014390.1_CSS014390	103	N	PREDICTED: probable LRR receptor-like serine/threonine-protein kinase At4g20940 isoform X2 [Juglans regia]	---	0.948341	0.000437349	69.864	LSMPN(0.948)N(0.052)SITGK	3	1.5094	2
CSS014586.1_CSS014586	119	N	PREDICTED: probable inactive purple acid phosphatase 1 [Vitis vinifera]	---	1	1.1925e-05	128.03	YQYAN(1)YTNPK	3	0.31825	2	0.991	0.933	0.928
CSS014785.1_CSS014785	175	N	PREDICTED: subtilisin-like protease SBT1.7 [Solanum pennellii]	---	1	0.00336847	108.9	N(1)FSSSSCNR	2	-0.018471	1	1.038	0.988	0.985
CSS014863.1_CSS014863	103	N	PREDICTED: fasciclin-like arabinogalactan protein 7 [Vitis vinifera]	---	1	9.02008e-08	156	KPSLSN(1)LTQDK	3	0.20296	2	1.145	1.014	1.067
CSS014920.1_CSS014920	318	N	PREDICTED: beta-hexosaminidase 1 [Vitis vinifera]	---	1	6.78967e-05	99.055	N(1)FTFDVISGILSDMR	3	-0.11088	1	0.903	0.772	0.946
CSS014920.1_CSS014920	511	N	PREDICTED: beta-hexosaminidase 1 [Vitis vinifera]	---	1	0.000273081	80.738	EDLPAGN(1)ITITVLPR	2	-0.33841	1	1.065	0.958	0.935
CSS014967.1_CSS014967	313	N	PREDICTED: leucine-rich repeat extensin-like protein 6 [Vitis vinifera]	---	0.999951	3.63045e-05	68.168	LQN(1)FTYSYNFFDGEPDMCLK	3	-0.03253	2	0.965	1.107	1.074
CSS015752.1_CSS015752	85	N	PREDICTED: subtilisin-like protease SBT1.4 [Nicotiana tabacum]	---	1	4.14167e-05	133.05	LN(1)ASQAADLR	2	0.010288	1	0.887	0.904	0.912
CSS015752.1_CSS015752	394	N	PREDICTED: subtilisin-like protease SBT1.4 [Nicotiana tabacum]	---	1	0.00248681	96.229	LN(1)STEVAGK	2	-0.8452	2	0.959	0.944	0.933
CSS015752.1_CSS015752	587	N	PREDICTED: subtilisin-like protease SBT1.4 [Nicotiana tabacum]	---	1	4.01746e-07	93.34	N(1)ITDLATGDESTPFIHGAGHVDPNR	4	-0.18515	2	1.157	0.895	1.098
CSS016097.1_CSS016097	131	N	PREDICTED: dirigent protein 22-like [Juglans regia]	---	1	0.000278119	95.094	YN(1)GSSLSILGR	2	-0.77507	1	0.913	0.99	1.014
CSS016165.1_CSS016165	103	N	PREDICTED: protein disulfide isomerase-like 1-4 [Populus euphratica]	---	1	8.10821e-09	127.17	DSN(1)FSDFIAK	3	0.51175	9	0.794	0.776	0.776
CSS016165.1_CSS016165	540	N	PREDICTED: protein disulfide isomerase-like 1-4 [Populus euphratica]	---	1	8.01439e-12	139.86	SDGFPTILFFPAGN(1)K	3	0.23212	4	0.777	0.767	0.743
CSS016165.1_CSS016165	331	N	PREDICTED: protein disulfide isomerase-like 1-4 [Populus euphratica]	---	1	1.19398e-05	122.1	NQLLLFATSN(1)DSETFQPMFR	3	-0.29771	5	0.846	0.855	0.752
CSS016947.1_CSS016947	77	N	PREDICTED: probable inactive purple acid phosphatase 29 [Citrus sinensis]	---	1	1.28248e-07	95.5	TTPCKDVLPEQVPGCSDLN(1)TTAFLK	4	0.29044	6	0.899	0.834	0.844
CSS016947.1_CSS016947	381	N	PREDICTED: probable inactive purple acid phosphatase 29 [Citrus sinensis]	---	1	0.000225651	97.734	SSVGN(1)ASSLVP	2	0.47536	1	1.062	1.039	1.013
CSS016948.1_CSS016948	77	N	PREDICTED: probable inactive purple acid phosphatase 29 [Jatropha curcas]	---	1	2.0459e-08	151.74	GCSDLN(1)TTAFLK	2	-0.20972	3	0.897	0.893	0.887
CSS017418.1_CSS017418	125	N	PREDICTED: fasciclin-like arabinogalactan protein 10 [Vitis vinifera]	---	0.973961	2.38308e-11	73.761	LHQITDGTTTTTTLYQTTGN(0.013)AAGN(0.013)IGSVN(0.974)ITDLK	4	-3.2176	1	1.048	0.955	0.961
CSS017687.1_CSS017687	1226	N	PREDICTED: protein NETWORKED 1D [Vitis vinifera]	---	0.991555	0.00550048	58.246	ENGYLN(0.992)EAN(0.008)R	2	2.2269	1	1.24	0.942	0.992
CSS017840.1_CSS017840	351	N	PREDICTED: receptor-like protein kinase HSL1 [Nelumbo nucifera]	---	0.992082	1.3981e-05	72.705	N(0.008)QLN(0.992)GSLPSELGK	3	-0.25609	1
CSS017871.1_CSS017871	322	N	PREDICTED: GDSL esterase/lipase At5g55050 [Vitis vinifera]	---	1	4.38469e-05	95.57	AQVPCLPISSYCSN(1)R	3	-0.35943	1	0.926	1.094	0.996
CSS017917.1_CSS017917	363	N	PREDICTED: reticuline oxidase-like protein [Eucalyptus grandis]	---	1	0.00690394	50.467	TLDQN(1)ATELVHR	3	0.62574	1
CSS017917.1_CSS017917	168	N	PREDICTED: reticuline oxidase-like protein [Eucalyptus grandis]	---	1	0.00936384	91.658	FN(1)TSSTPK	2	0.51291	1	0.931	0.91	0.945
CSS018263.1_CSS018263	252	N	PREDICTED: lysM domain-containing GPI-anchored protein 2 [Vitis vinifera]	---	1	1.44216e-05	83.54	CDAAN(1)WTLQCEPSQAK	3	0.41463	1	1.106	1.331	0.955
CSS018263.1_CSS018263	73	N	PREDICTED: lysM domain-containing GPI-anchored protein 2 [Vitis vinifera]	---	1	0.0002807	106.75	YLLGANNFLLSTPPN(1)QTVSAK	3	1.267	1
CSS018263.1_CSS018263	196	N	PREDICTED: lysM domain-containing GPI-anchored protein 2 [Vitis vinifera]	---	0.998067	1.82657e-06	130.1	LN(0.002)N(0.998)LTSSDQLK	2	0.881	3	1.115	1.031	1.129
CSS018502.1_CSS018502	71	N	PREDICTED: beta-hexosaminidase 3 [Juglans regia]	---	1	1.23108e-18	159.52	HALN(1)ESEAYQYFVLR	3	1.6672	1	1.008	1.003	1.039
CSS018726.1_CSS018726	167	N	PREDICTED: adhesive plaque matrix protein 2 [Jatropha curcas]	---	0.992606	8.04804e-07	74.141	ECALGMDCSGLGIN(0.007)VMN(0.993)K	3	-1.4995	2	1.05	1.066	1.11
CSS018782.1_CSS018782	113	N	PREDICTED: probable inactive purple acid phosphatase 1 isoform X1 [Citrus sinensis]	---	1	4.98418e-08	152.32	YQYAN(1)YTNPEFK	2	-0.23769	5	0.993	0.93	0.951
CSS018782.1_CSS018782	313	N	PREDICTED: probable inactive purple acid phosphatase 1 isoform X1 [Citrus sinensis]	---	1	0.00947164	124.08	GSLN(1)TTK	2	0.36616	1	0.998	0.989	0.956
CSS018882.1_CSS018882	583	N	brassinosteroid LRR receptor kinase precursor [Solanum lycopersicum]	---	0.997454	7.49072e-28	131.45	LGN(0.997)N(0.003)SFAGR	2	-0.29509	1
CSS018931.1_CSS018931	216	N	PREDICTED: probable polygalacturonase isoform X1 [Nicotiana sylvestris]	---	1	3.85873e-06	115.12	DIVGTN(1)ITTAGK	2	-0.2701	2	0.885	0.886	0.869
CSS019061.1_CSS019061	324	N	PREDICTED: L-ascorbate oxidase homolog [Juglans regia]	---	1	0.000633651	150.15	TN(1)LTASGPR	2	0.025185	2	0.845	0.882	0.831
CSS019061.1_CSS019061	108	N	PREDICTED: L-ascorbate oxidase homolog [Juglans regia]	---	1	0.00308197	110.38	N(1)FTYILQVK	2	-0.60649	1	0.919	0.851	0.928
CSS019101.1_CSS019101	111	N	PREDICTED: putative late blight resistance protein homolog R1B-14 [Daucus carota subsp. sativus]	---	1	0.00455758	48.981	KRN(1)LAWLDLK	3	-3.4404	1
CSS019238.1_CSS019238	142	N	PREDICTED: disease resistance response protein 206-like [Juglans regia]	---	1	0.000235866	74.853	GSINFAGADPLMN(1)K	3	-0.60943	1	0.942	1.018	1.001
CSS019711.1_CSS019711	357	N	PREDICTED: aspartic proteinase Asp1 isoform X1 [Fragaria vesca subsp. vesca]	---	0.999701	0.00558202	57.39	SMALN(1)FTNAR	2	0.060176	1	1.024	1.046	1.054
CSS019720.1_CSS019720	314	N	serine carboxypeptidase S10 family protein [Populus trichocarpa]	---	1	3.29844e-07	97.057	SLGVN(1)ESMVYEECSDVVGTALHEDVMK	4	0.29321	1	0.899	0.966	1.001
CSS020429.1_CSS020429	209	N	PREDICTED: peroxidase 27 [Eucalyptus grandis]	---	1	0.0301903	47.749	LYN(1)FTGK	2	1.3872	1
CSS020581.1_CSS020581	248	N	PREDICTED: probable glucan 1,3-beta-glucosidase A isoform X1 [Citrus sinensis]	---	0.999983	4.47711e-09	167.11	FISNNGIN(1)AVR	2	-1.1279	2	0.883	0.886	0.895
CSS020581.1_CSS020581	114	N	PREDICTED: probable glucan 1,3-beta-glucosidase A isoform X1 [Citrus sinensis]	---	1	0.000712108	128.81	IN(1)ETTFQFR	2	0.2296	2	0.805	0.816	0.848
CSS020727.1_CSS020727	378	N	PREDICTED: beta-glucosidase 44-like [Citrus sinensis]	---	1	0.000212952	113.47	DLGYQQDWN(1)ASFAYEK	3	-0.065196	1	0.857	0.799	0.756
CSS021117.1_CSS021117	757	N	PREDICTED: putative pentatricopeptide repeat-containing protein At3g25970 [Citrus sinensis]	---	1	0.00457647	113.89	YLVN(1)ATR	2	0.57434	2	0.965	0.942	0.941
CSS021117.1_CSS021117	914	N	PREDICTED: putative pentatricopeptide repeat-containing protein At3g25970 [Citrus sinensis]	---	0.993283	0.000569535	56.121	IGTGDDCISIVN(0.993)ASSN(0.007)IK	3	-0.23763	1
CSS021178.1_CSS021178	281	N	PREDICTED: lysosomal alpha-mannosidase-like [Nicotiana sylvestris]	---	1	0.00117328	99.813	INDFVAAALAQAN(1)ITR	3	0.47003	1	0.741	0.463	0.818
CSS021178.1_CSS021178	159	N	PREDICTED: lysosomal alpha-mannosidase-like [Nicotiana sylvestris]	---	1	3.56366e-07	150.69	FIKEEFN(1)VTPR	3	0.17568	3	0.822	0.811	0.797
CSS021178.1_CSS021178	28	N	PREDICTED: lysosomal alpha-mannosidase-like [Nicotiana sylvestris]	---	1	1.25585e-05	100.22	YMVYN(1)TSQGVVPGK	3	0.0020526	2	0.948	0.858	0.854
CSS021178.1_CSS021178	569	N	PREDICTED: lysosomal alpha-mannosidase-like [Nicotiana sylvestris]	---	1	2.71268e-12	144.73	VTGSQN(1)DTIEVGPGNLK	2	-0.96962	2	0.842	0.859	0.858
CSS021178.1_CSS021178	822	N	PREDICTED: lysosomal alpha-mannosidase-like [Nicotiana sylvestris]	---	1	1.67683e-62	206.34	GVAEALN(1)ETVCIHDECTGLTVQGK	4	0.92468	4	0.921	0.962	0.972
CSS021178.1_CSS021178	504	N	PREDICTED: lysosomal alpha-mannosidase-like [Nicotiana sylvestris]	---	1	4.98088e-06	82.121	EVESQLVPIAN(1)VSLGMR	2	1.0109	3	0.862	0.945	0.878
CSS021203.1_CSS021203	224	N	calcium/calcium/calmodulin-dependent Serine/Threonine-kinase [Arabidopsis thaliana]	---	1	2.7283e-22	191.78	GGFN(1)GTYDLGSGSR	2	-0.13469	2	1	1.022	1.03
CSS021237.1_CSS021237	109	N	PREDICTED: non-specific lipid transfer protein GPI-anchored 1 [Vitis vinifera]	---	1	0.000441243	83.182	LTN(1)ASVSDCPK	3	0.1185	2	1.032	1.062	1.079
CSS021532.1_CSS021532	222	N	PREDICTED: photosystem I reaction center subunit III, chloroplastic-like [Daucus carota subsp. sativus]	---	1	0.011226	60.161	EFVN(1)GDLIDPTV	2	0.53499	1	1.05	0.918	0.908
CSS021771.1_CSS021771	510	N	PREDICTED: probable leucine-rich repeat receptor-like protein kinase At5g49770 [Capsicum annuum]	---	1	5.61448e-11	143.76	VQIFPSGQDQFN(1)R	2	1.2098	2	0.948	1.015	0.912
CSS021881.1_CSS021881	164	N	folate receptor family protein [Arabidopsis thaliana]	---	1	4.56399e-05	101.72	ASEWTSN(1)GTELCR	2	1.5929	1
CSS021904.1_CSS021904	263	N	PREDICTED: protein ASPARTIC PROTEASE IN GUARD CELL 1 [Ricinus communis]	---	1	0.000662383	145.25	SGN(1)FSGSLR	2	0.026881	1	0.799	0.806	0.794
CSS021912.1_CSS021912	141	N	PREDICTED: purple acid phosphatase [Eucalyptus grandis]	---	1	1.02179e-06	124.38	YYYEVGIGN(1)TTR	2	1.7671	1	0.968	0.889	0.855
CSS021912.1_CSS021912	175	N	PREDICTED: purple acid phosphatase [Eucalyptus grandis]	---	0.999831	1.0533e-11	85.937	VGPDVPYTFGLIGDLGQTYDSN(1)TTLTHYELNPAK	5	1.5597	1	0.979	0.834	0.858
CSS022091.1_CSS022091	152	N	PREDICTED: blue copper protein-like [Juglans regia]	---	1	0.0010594	66.267	IN(1)VTYGQGLPK	3	0.052095	1
CSS022463.1_CSS022463	244	N	PREDICTED: berberine bridge enzyme-like 21 [Vitis vinifera]	---	1	9.82038e-54	231.52	TLEQN(1)ATDIVYR	2	0.46344	3	0.819	0.861	0.847
CSS022463.1_CSS022463	257	N	PREDICTED: berberine bridge enzyme-like 21 [Vitis vinifera]	---	1	0.00271611	116.54	WQFVAN(1)K	2	-1.1	1	0.844	0.827	0.772
CSS022481.1_CSS022481	65	N	PREDICTED: wall-associated receptor kinase-like 20 [Gossypium arboreum]	---	0.820809	1.10024e-18	156.13	FDTLN(0.821)N(0.179)TYSIATITPDIQR	3	-1.2548	1	1.151	1.119	1.262
CSS022862.1_CSS022862	161	N	PREDICTED: aspartic proteinase Asp1-like isoform X1 [Citrus sinensis]	---	1	1.47105e-06	166.86	LIN(1)GSVAGPR	2	-0.35809	4	1.097	1.093	1.094
CSS023453.1_CSS023453	258	N	PREDICTED: serine carboxypeptidase 24 [Ricinus communis]	---	1	0.00767448	73.248	ALHAN(1)ITK	3	0.66561	1	0.842	0.913	0.838
CSS023502.1_CSS023502	126	N	PREDICTED: bark storage protein A-like [Juglans regia]	---	1	2.13088e-13	87.352	GIVHYGIAGSAN(1)DSMSLGDVSIPK	3	0.53313	2	0.926	1.031	1.007
CSS023849.1_CSS023849	332	N	photosystem II p680 chlorophyll A apoprotein (chloroplast) [Camellia crapnelliana]	---	1	7.20694e-09	52.814	AGSMDN(1)GDGIAVGWLGHPIFR	3	3.9325	1
CSS023851.1_CSS023851	339	N	PREDICTED: low-temperature-induced cysteine proteinase [Theobroma cacao]	---	1	1.79077e-07	90.464	RN(1)TSDEYGVCAINAMASYPTK	4	-0.47963	12	1.072	1.071	1.071
CSS023855.1_CSS023855	216	N	PREDICTED: aspartyl protease family protein At5g10770-like [Gossypium arboreum]	---	1	0.0218534	56.414	CFTN(1)TCVYGVR	2	-0.79853	1	1.031	1.043	1.073
CSS023866.1_CSS023866	195	N	PREDICTED: protein ASPARTIC PROTEASE IN GUARD CELL 2-like [Gossypium raimondii]	---	0.993351	7.99321e-05	62.999	N(0.993)ISCN(0.007)SAECTQLTSDAGGVMK	3	-0.91905	1	0.901	1.066	1.008
CSS023899.1_CSS023899	359	N	PREDICTED: mannan endo-1,4-beta-mannosidase 6-like [Populus euphratica]	---	1	0.000497329	152.54	DPGYN(1)SSFR	2	0.60123	1	0.883	0.881	0.869
CSS023899.1_CSS023899	376	N	PREDICTED: mannan endo-1,4-beta-mannosidase 6-like [Populus euphratica]	---	0.999763	1.01817e-07	128.06	DTLISTVYNSLLN(1)STK	3	0.59113	1	0.981	0.857	0.894
CSS023954.1_CSS023954	245	N	PREDICTED: fasciclin-like arabinogalactan protein 2 [Theobroma cacao]	---	1	0.0170114	89.698	N(1)LTAAGK	2	0.00042152	1	0.985	0.993	1.041
CSS024068.1_CSS024068	387	N	PREDICTED: alpha-L-fucosidase 1 [Juglans regia]	---	1	5.76616e-07	154.85	QGIN(1)DSQFDSR	2	0.4787	1	0.805	0.849	0.86
CSS024068.1_CSS024068	460	N	PREDICTED: alpha-L-fucosidase 1 [Juglans regia]	---	1	2.91858e-05	108.35	EVTN(1)GTTVGHK	3	0.30845	4	0.853	0.812	0.867
CSS024414.1_CSS024414	529	N	PREDICTED: pectinesterase-like [Gossypium raimondii]	---	1	0.000154275	84.195	EYQN(1)SGAGAGTSGR	2	-0.50938	1	0.876	0.838	0.877
CSS024880.1_CSS024880	340	N	PREDICTED: low-temperature-induced cysteine proteinase [Theobroma cacao]	---	0.999999	2.77704e-07	78.354	N(1)TSDPFGVCAINAMASYPTK	4	-0.57267	5	1.189	1.055	1.08
CSS025160.1_CSS025160	72	N	PREDICTED: probable L-type lectin-domain containing receptor kinase S.5 [Nicotiana sylvestris]	---	0.988605	0.000147161	109.85	DALQVTPDTISDIIN(0.011)LTN(0.989)QSGR	3	0.24371	2	0.975	1.109	1.007
CSS025204.1_CSS025204	318	N	PREDICTED: probable inactive purple acid phosphatase 27 [Fragaria vesca subsp. vesca]	---	0.997629	0.000483233	50.858	DGSNEYSN(0.002)YQPGSLN(0.998)TTDQLIK	4	0.020733	1
CSS025318.1_CSS025318	58	N	PREDICTED: purple acid phosphatase 3 [Eucalyptus grandis]	---	1	0.0100599	106.04	GLFN(1)QSK	2	0.39767	1	0.765	0.767	0.746
CSS025403.1_CSS025403	627	N	PREDICTED: subtilisin-like protease SBT1.7 [Theobroma cacao]	---	1	0.00497008	90.614	TN(1)FTCDPTKK	3	1.1959	2	0.951	1.015	0.955
CSS025840.1_CSS025840	353	N	PREDICTED: IAA-amino acid hydrolase ILR1-like 3 [Vitis vinifera]	---	1	4.71552e-09	77.372	MAATYFMIGTMN(1)ETIK	3	1.96	3	0.983	0.925	1.023
CSS026005.1_CSS026005	687	N	PREDICTED: neutral ceramidase [Gossypium raimondii]	---	1	0.000394981	108.56	IDVPSN(1)STFK	2	-0.57513	1	1.027	1.051	1.057
CSS027115.1_CSS027115	146	N	PREDICTED: lipid phosphate phosphatase 2 [Vitis vinifera]	---	0.997198	0.00605459	147.36	AVFN(0.003)N(0.997)VTR	2	-0.71409	1	0.76	0.84	0.762
CSS027129.1_CSS027129	399	N	PREDICTED: erlin-2-B [Juglans regia]	---	0.999764	9.35764e-14	145.91	FIEAISN(1)NTK	3	0.099825	3	0.754	0.715	0.735
CSS027254.1_CSS027254	87	N	PREDICTED: alpha-mannosidase isoform X2 [Gossypium raimondii]	---	0.999804	4.27205e-59	233.78	TVDQYYVGAN(1)NSIR	2	0.13451	8	0.9	0.907	0.895
CSS027254.1_CSS027254	493	N	PREDICTED: alpha-mannosidase isoform X2 [Gossypium raimondii]	---	1	6.96468e-13	143.93	FQQCPLLN(1)VSYCPPSEAALSNGK	4	-0.27347	6	1.093	1.038	1.091
CSS027254.1_CSS027254	301	N	PREDICTED: alpha-mannosidase isoform X2 [Gossypium raimondii]	---	1	4.46158e-08	133.93	VDDFVAAAVAQAN(1)VTR	3	-1.4528	2	1.018	0.762	0.87
CSS027944.1_CSS027944	192	N	PREDICTED: cysteine-rich receptor-like protein kinase 10 isoform X1 [Vitis vinifera]	---	1	0.00318276	97.734	EAN(1)FTSLQK	2	0.56714	1	0.897	0.975	0.929
CSS027995.1_CSS027995	146	N	PREDICTED: putative amidase C869.01 [Vitis vinifera]	---	1	2.61903e-05	86.136	DKLN(1)TTAGSYALLGSVVAR	3	-0.351	1	0.896	0.948	0.902
CSS028048.1_CSS028048	440	N	PREDICTED: beta-xylosidase/alpha-L-arabinofuranosidase 2 [Theobroma cacao]	---	1	2.16814e-05	94.09	SLAVIGPN(1)GN(1)VTK	2	0.041387	2	0.905	0.941	0.946
CSS028048.1_CSS028048	56	N	PREDICTED: beta-xylosidase/alpha-L-arabinofuranosidase 2 [Theobroma cacao]	---	0.999805	1.49427e-05	124.77	NPSLAN(1)LTFCDPTVAVAAR	3	0.082974	1	0.906	0.952	0.934
CSS028048.1_CSS028048	442	N	PREDICTED: beta-xylosidase/alpha-L-arabinofuranosidase 2 [Theobroma cacao]	---	1	5.82128e-28	194.13	SLAVIGPN(1)GN(1)VTK	2	0.041387	10	0.862	0.865	0.833
CSS028556.1_CSS028556	140	N	PREDICTED: kynurenine formamidase [Daucus carota subsp. sativus]	---	1	0.00720332	51.286	DEN(1)ITAEVMK	2	0.30648	2	0.977	0.979	0.938
CSS028711.1_CSS028711	149	N	PREDICTED: nigrin b-like [Malus domestica]	---	1	1.38627e-27	186.69	GATTLELNNLFN(1)GTQK	3	0.55673	8	0.895	0.882	0.869
CSS028760.1_CSS028760	144	N	PREDICTED: cytochrome b6-f complex iron-sulfur subunit 1, chloroplastic [Vitis vinifera]	---	1	0.000449173	84.753	GDPTYLVVEN(1)DR	2	1.0258	2	1.153	1.126	1.111
CSS028989.1_CSS028989	264	N	PREDICTED: xylose isomerase [Jatropha curcas]	---	1	3.98384e-06	99.5	IGFN(1)GTLLIEPK	2	0.79713	2	0.798	0.795	0.79
CSS029316.1_CSS029316	225	N	PREDICTED: aspartic proteinase-like protein 2 isoform X3 [Capsicum annuum]	---	1	2.09956e-07	43.055	QSGQLGSSSQALDGILGFGQAN(1)SSMISQLASVGK	4	-1.532	1	0.867	1.073	1.113
CSS029522.1_CSS029522	139	N	PREDICTED: protein NUCLEAR FUSION DEFECTIVE 2 [Vitis vinifera]	---	1	4.12205e-05	92.38	TN(1)SSSPSVVCGAFR	2	0.37227	1	0.879	0.999	0.882
CSS029539.1_CSS029539	909	N	PREDICTED: nuclear-pore anchor isoform X1 [Vitis vinifera]	---	1	0.0101757	45.829	N(1)AMRQVEEMGK	2	-2.5701	1	0.886	1.066	0.991
CSS029741.1_CSS029741	98	N	PREDICTED: transmembrane 9 superfamily member 11 [Vitis vinifera]	---	0.798059	0.000974732	70.089	MN(0.202)TN(0.798)ETEIFLCK	3	-1.5441	1	1.062	0.983	1.024
CSS030037.1_CSS030037	564	N	PREDICTED: monocopper oxidase-like protein SKU5 [Cucumis melo]	---	0.984046	1.20772e-06	120.87	GFMEIILQN(0.016)N(0.984)DTK	3	-0.95328	2	0.783	0.841	0.809
CSS030037.1_CSS030037	413	N	PREDICTED: monocopper oxidase-like protein SKU5 [Cucumis melo]	---	1	2.46852e-06	170.47	FVN(1)ESLWQR	2	-0.31798	1	0.771	0.808	0.822
CSS030037.1_CSS030037	462	N	PREDICTED: monocopper oxidase-like protein SKU5 [Cucumis melo]	---	1	9.29375e-08	172.88	WN(1)VSASGAR	2	1.676	2	0.809	0.829	0.818
CSS030037.1_CSS030037	654	N	PREDICTED: monocopper oxidase-like protein SKU5 [Cucumis melo]	---	1	0.0022075	114.89	IVNPEASN(1)K	2	0.42648	1	0.778	0.792	0.774
CSS030037.1_CSS030037	550	N	PREDICTED: monocopper oxidase-like protein SKU5 [Cucumis melo]	---	1	1.69752e-06	126.21	MESSIIN(1)GTYR	3	0.8105	5	0.785	0.831	0.783
CSS030423.1_CSS030423	87	N	PREDICTED: cysteine-rich repeat secretory protein 38 [Theobroma cacao]	---	1	2.65624e-36	186.62	GDVN(1)TTDCAACVAEASSEIR	2	-0.52209	3	1.207	1.186	1.18
CSS030423.1_CSS030423	77	N	PREDICTED: cysteine-rich repeat secretory protein 38 [Theobroma cacao]	---	1	6.65902e-07	45.878	TPPTGFGVGSVGQYQDTAN(1)GLSLCR	3	0.51214	1
CSS030423.1_CSS030423	145	N	PREDICTED: cysteine-rich repeat secretory protein 38 [Theobroma cacao]	---	1	3.27025e-52	227.48	N(1)VSNPLSFNQK	2	-0.69348	6	1.19	1.193	1.17
CSS030423.1_CSS030423	153	N	PREDICTED: cysteine-rich repeat secretory protein 38 [Theobroma cacao]	---	0.999827	0.00284192	55.261	N(0.714)VSN(0.286)PLSFN(1)QK	2	-0.30267	1
CSS030553.1_CSS030553	95	N	calcium-dependent phosphotriesterase superfamily protein [Medicago truncatula]	---	1	4.96468e-05	122.44	EAELAGN(1)ASLGIVIDRPR	3	0.34904	1	0.989	0.961	0.958
CSS030970.1_CSS030970	650	N	PREDICTED: probable beta-D-xylosidase 5 [Theobroma cacao]	---	1	0.0038404	105.46	SN(1)STTQIIK	2	0.59306	1	0.955	0.904	0.886
CSS030970.1_CSS030970	39	N	PREDICTED: probable beta-D-xylosidase 5 [Theobroma cacao]	---	1	1.26801e-05	123.83	NDPNTPTYQFCN(1)TSLSYSSR	3	-0.53322	1	1.044	0.968	0.936
CSS030970.1_CSS030970	507	N	PREDICTED: probable beta-D-xylosidase 5 [Theobroma cacao]	---	1	2.09488e-28	189.81	VN(1)LTLPGFQEK	3	0.055193	4	0.897	0.896	0.86
CSS031304.1_CSS031304	572	N	PREDICTED: glycerophosphodiester phosphodiesterase GDPDL3-like [Juglans regia]	---	1	0.00149547	120.06	FAN(1)SVVISK	2	-0.028931	1	0.967	0.983	0.933
CSS031304.1_CSS031304	533	N	PREDICTED: glycerophosphodiester phosphodiesterase GDPDL3-like [Juglans regia]	---	1	2.67465e-07	122.46	KIMVQSSN(1)SSVLK	3	0.42586	9	0.96	0.932	0.924
CSS031304.1_CSS031304	234	N	PREDICTED: glycerophosphodiester phosphodiesterase GDPDL3-like [Juglans regia]	---	1	9.10676e-27	164.2	FLGAAEVEPSTN(1)QTYESLSK	3	0.10085	5	0.92	0.889	0.91
CSS031381.1_CSS031381	154	N	PREDICTED: peroxidase P7-like [Solanum tuberosum]	---	1	4.94255e-54	224.06	VYN(1)ETNIDSSFAQTR	2	-0.8874	2	0.957	0.963	0.989
CSS031569.1_CSS031569	176	N	PREDICTED: subtilisin-like protease SBT1.7 [Ricinus communis]	---	0.999983	2.58509e-73	167.37	GVCEVGNNFN(1)SSSCNR	3	-0.79656	4	0.954	1.05	0.97
CSS031906.1_CSS031906	76	N	PREDICTED: cysteine proteinase COT44 [Sesamum indicum]	---	1	1.55728e-14	190.57	FVDEHNSEN(1)R	3	0.17288	2	0.934	0.927	1
CSS031947.1_CSS031947	416	N	PREDICTED: heat shock 70 kDa protein 17 [Prunus mume]	---	1	0.000310149	123.35	AAN(1)LSDGIK	2	-1.1557	3	0.878	0.908	0.88
CSS031947.1_CSS031947	517	N	PREDICTED: heat shock 70 kDa protein 17 [Prunus mume]	---	1	0.00608388	111.74	N(1)LSSPIK	2	-0.14946	1	0.894	0.926	0.907
CSS032691.1_CSS032691	79	N	PREDICTED: probable receptor-like protein kinase At5g24010 [Vitis vinifera]	---	0.89213	0.000125117	70.452	TSSVSDTN(0.892)TSN(0.108)SSPLYQTAR	2	-0.8924	1	0.9	0.938	0.921
CSS032865.1_CSS032865	142	N	PREDICTED: ectonucleotide pyrophosphatase/phosphodiesterase family member 3-like [Nicotiana tomentosiformis]	---	1	0.0266357	58.172	LIDN(1)GTEAER	2	0.51968	1
CSS033049.1_CSS033049	252	N	PREDICTED: peroxidase 12 [Fragaria vesca subsp. vesca]	---	1	6.6995e-30	191.96	VTCPALDTDN(1)TTVLDIR	3	1.4513	3	0.917	0.947	0.933
CSS033049.1_CSS033049	301	N	PREDICTED: peroxidase 12 [Fragaria vesca subsp. vesca]	---	1	1.28134e-06	113.07	SFAVN(1)ETLFFEK	3	-0.34848	1	0.916	0.926	0.91
CSS033163.1_CSS033163	38	N	PREDICTED: heat shock cognate protein 80 [Ziziphus jujuba]	---	1	1.07821e-06	114.72	ELISN(1)ASDALDK	2	1.0733	2	0.944	0.906	0.941
CSS033219.1_CSS033219	77	N	PREDICTED: lysosomal Pro-X carboxypeptidase [Vitis vinifera]	---	1	1.09114e-06	124.12	YLIN(1)DTYWGGAK	2	-1.4228	1	1.024	0.92	0.966
CSS033238.1_CSS033238	286	N	PREDICTED: basic 7S globulin-like [Juglans regia]	---	1	7.05885e-06	73.057	N(0.003)VPIN(0.997)TTLLTIDSEGN(1)GGTK	3	0.0045472	1
CSS033238.1_CSS033238	275	N	PREDICTED: basic 7S globulin-like [Juglans regia]	---	0.999449	2.05253e-53	136.49	N(0.001)VPIN(0.999)TTLLTIDSEGNGGTK	3	2.1657	6	1.024	0.968	0.966
CSS033238.1_CSS033238	429	N	PREDICTED: basic 7S globulin-like [Juglans regia]	---	0.999412	1.63376e-05	98.156	TTCAN(0.001)FN(0.999)FTSNA	2	0.31779	1	0.998	0.971	1.003
CSS033526.1_CSS033526	431	N	PREDICTED: aspartic proteinase-like isoform X1 [Juglans regia]	---	1	0.000287908	83.182	MPN(1)VTVTLGSK	2	-1.9511	7	1.088	1.116	1.065
CSS033587.1_CSS033587	63	N	PREDICTED: serine carboxypeptidase-like 40 [Eucalyptus grandis]	---	1	9.30335e-11	102.6	AANVLFLESPAGVGFSYSN(1)TTSDYVSGGDKR	4	0.080731	3	0.865	0.898	0.912
CSS033587.1_CSS033587	307	N	PREDICTED: serine carboxypeptidase-like 40 [Eucalyptus grandis]	---	0.973972	0.00019776	53.998	YCDFSPN(0.974)ATTQSN(0.026)ECDTAITEAVK	4	0.48682	1	1.038	0.818	0.985
CSS033587.1_CSS033587	380	N	PREDICTED: serine carboxypeptidase-like 40 [Eucalyptus grandis]	---	1	1.4209e-08	134.14	ADVQEALHAN(1)VTK	3	-0.24904	6	0.856	0.851	0.86
CSS033587.1_CSS033587	126	N	PREDICTED: serine carboxypeptidase-like 40 [Eucalyptus grandis]	---	0.994584	0.000470374	105.13	GPN(0.995)N(0.005)TFINLK	2	0.27795	2	0.85	0.864	0.872
CSS033762.1_CSS033762	222	N	PREDICTED: probable receptor-like protein kinase At5g24010 [Vitis vinifera]	---	1	1.95046e-47	142.91	VSSSGSN(1)STYDGLLSR	3	1.1945	1
CSS033889.1_CSS033889	345	N	PREDICTED: monocopper oxidase-like protein SKS1 [Solanum tuberosum]	---	1	2.28142e-18	192.64	QN(1)VSASGAR	2	0.44111	1	0.714	0.697	0.704
CSS033889.1_CSS033889	203	N	PREDICTED: monocopper oxidase-like protein SKS1 [Solanum tuberosum]	---	0.999824	0.00101115	42.209	YN(1)TTLVPDGIDYETINVDPGK	3	0.16861	1	0.886	0.931	0.935
CSS033889.1_CSS033889	433	N	PREDICTED: monocopper oxidase-like protein SKS1 [Solanum tuberosum]	---	1	0.00493538	132.01	SVIN(1)ATYK	3	1.5214	2	0.715	0.743	0.741
CSS033973.1_CSS033973	173	N	PREDICTED: probable L-type lectin-domain containing receptor kinase II.1 [Juglans regia]	---	1	6.22375e-66	233.48	SN(1)VSATATYYSSSER	3	0.66802	3	1.011	1.003	1.01
CSS034076.1_CSS034076	89	N	PREDICTED: protein HOTHEAD-like [Prunus mume]	---	0.996629	1.02982e-10	111.95	GDSPYGDPN(0.997)ITN(0.002)LSAFGN(0.001)SLSDLSPTSPSQR	3	0.68187	3	0.93	1.023	1.046
CSS034076.1_CSS034076	552	N	PREDICTED: protein HOTHEAD-like [Prunus mume]	---	0.909713	3.19142e-08	75.225	VIDGSTFN(0.91)N(0.09)SPGTNPQATVMMLGR	3	-0.26015	2	1.014	0.943	1.083
CSS034233.1_CSS034233	252	N	PREDICTED: peroxidase 12 [Populus euphratica]	---	0.999457	0.000275111	97.129	VICPTTN(0.999)STN(0.001)TAVLDIR	3	-0.065949	1
CSS034312.1_CSS034312	442	N	PREDICTED: dolichyl-diphosphooligosaccharide--protein glycosyltransferase subunit 1B [Jatropha curcas]	---	1	1.50893e-17	184.65	DEIGN(1)ISSSHLR	3	0.139	3	0.88	0.818	0.864
CSS034335.1_CSS034335	203	N	PREDICTED: protein disulfide isomerase-like 1-4 [Populus euphratica]	---	1	1.29249e-65	227.86	IGPGVSN(1)ITSADDAER	3	0.0040353	4	0.932	0.944	0.908
CSS034335.1_CSS034335	332	N	PREDICTED: protein disulfide isomerase-like 1-4 [Populus euphratica]	---	1	4.61305e-17	181.26	QLLLFATSN(1)DSDK	2	-2.0911	2	0.95	0.958	0.93
CSS034335.1_CSS034335	102	N	PREDICTED: protein disulfide isomerase-like 1-4 [Populus euphratica]	---	1	9.46459e-68	245.85	ESN(1)FSDFVESNR	3	-0.44241	7	0.94	0.961	0.969
CSS034879.1_CSS034879	386	N	PREDICTED: phospholipid:diacylglycerol acyltransferase 1-like [Jatropha curcas]	---	0.999993	6.46939e-07	84.66	NSDTLVSGQN(1)ETGSMVSQVK	3	-0.30631	3	1.145	0.69	1.15
CSS035205.1_CSS035205	175	N	PREDICTED: subtilisin-like protease SBT1.7 [Theobroma cacao]	---	1	3.41978e-66	227.92	GTCESGTN(1)FTASNCNR	3	-0.62241	2	0.945	0.968	0.891
CSS035205.1_CSS035205	649	N	PREDICTED: subtilisin-like protease SBT1.7 [Theobroma cacao]	---	1	9.79695e-05	103.21	KN(1)FTCDPTNK	3	-0.30042	1	0.921	0.821	0.823
CSS035322.1_CSS035322	119	N	PREDICTED: nuclear envelope integral membrane protein 1 isoform X1 [Cucumis melo]	---	1	0.000160276	103.2	VN(1)VSSVSSSAR	2	0.24454	1	0.917	0.907	0.834
CSS035444.1_CSS035444	290	N	PREDICTED: transmembrane protein 245 [Gossypium arboreum]	---	1	2.91858e-05	108.35	LHVEESN(1)YTEK	3	-0.15328	2	0.895	0.864	0.805
CSS035788.1_CSS035788	268	N	PREDICTED: thaumatin-like protein 1b [Vitis vinifera]	---	1	4.47862e-05	127.92	ETAELPLVN(1)K	2	1.3301	2	1.046	1.056	1.078
CSS035860.1_CSS035860	110	N	PREDICTED: probable glucan 1,3-beta-glucosidase A [Populus euphratica]	---	1	0.0006668	146.11	IN(1)ETSYQLR	2	0.34981	1	0.751	0.774	0.793
CSS036444.1_CSS036444	57	N	calreticulin family protein [Populus trichocarpa]	---	1	5.54768e-12	139.77	KDENLAGEWN(1)FTSGK	3	0.15263	9	1.063	1.035	1.004
CSS036444.1_CSS036444	157	N	calreticulin family protein [Populus trichocarpa]	---	0.97822	5.3568e-05	98.592	VHAILTYN(0.978)DTN(0.022)HLIK	4	0.57113	2	1.079	0.985	0.975
CSS036616.1_CSS036616	280	N	PREDICTED: T-complex protein 1 subunit beta-like [Gossypium raimondii]	---	1	0.00207148	53.034	EGSN(1)TGIDVISRS	2	0.45403	1	0.926	1.043	0.978
CSS036778.1_CSS036778	309	N	PREDICTED: serine carboxypeptidase-like 40 [Juglans regia]	---	1	1.53184e-11	140.84	VDVQEALHAN(1)VTK	3	0.55063	7	0.939	0.924	0.89
CSS036813.1_CSS036813	223	N	PREDICTED: putative amidohydrolase YtcJ isoform X1 [Ricinus communis]	---	1	6.68819e-05	91.401	IAEISN(1)YTEDPNGGAIMR	3	-0.43292	4	0.985	0.976	0.979
CSS037235.1_CSS037235	544	N	PREDICTED: peptide-N4-(N-acetyl-beta-glucosaminyl)asparagine amidase A-like [Nelumbo nucifera]	---	1	0.000678574	74.78	MVTN(1)VSHSLTEK	3	-0.30599	1	1.044	1.123	1.11
CSS037441.1_CSS037441	37	N	PREDICTED: dnaJ homolog subfamily C member 16 isoform X1 [Citrus sinensis]	---	1	1.68245e-05	97.69	YN(1)GSEESSEIIK	2	0.76909	1	0.845	1.012	0.888
CSS037768.1_CSS037768	42	N	ferredoxin-like protein [Medicago truncatula]	---	0.96962	3.40843e-24	179.85	VTNNPADDLVATLN(0.03)SN(0.97)R	3	0.24367	1	1.028	0.951	1.299
CSS037961.1_CSS037961	174	N	PREDICTED: subtilisin-like protease SBT1.7 [Vitis vinifera]	---	1	1.5347e-30	192.4	GSCESGVEFN(1)SSNCNR	2	-1.017	2	0.813	0.857	0.793
CSS037961.1_CSS037961	488	N	PREDICTED: subtilisin-like protease SBT1.7 [Vitis vinifera]	---	1	1.14892e-08	163.38	PAPIVAN(1)FSSR	2	0.43244	5	0.804	1.037	0.639
CSS037961.1_CSS037961	383	N	PREDICTED: subtilisin-like protease SBT1.7 [Vitis vinifera]	---	1	9.94638e-05	109.48	VPIYFGHGN(1)R	3	-0.081981	4	0.838	0.817	0.788
CSS037961.1_CSS037961	198	N	PREDICTED: subtilisin-like protease SBT1.7 [Vitis vinifera]	---	1	0.00722228	105.2	EAGLN(1)ISK	2	0.19459	3	0.806	0.79	0.771
CSS038013.1_CSS038013	217	N	photosystem II CP43 chlorophyll apoprotein (chloroplast) [Actinidia deliciosa]	---	1	0.000673492	147.41	GPN(1)GLDLSR	2	-0.16367	2	0.885	0.92	0.919
CSS038215.1_CSS038215	93	N	PREDICTED: LDLR chaperone MESD [Vitis vinifera]	---	1	5.81664e-06	121.99	EFVLN(1)QSEAYEIK	2	0.59578	1	1.133	1.104	1.03
CSS038271.1_CSS038271	294	N	PREDICTED: berberine bridge enzyme-like 8 [Vitis vinifera]	---	1	2.42968e-08	133.48	LIVDVVN(1)VTSSSGEK	3	-0.25427	1	0.82	0.829	0.738
CSS038271.1_CSS038271	265	N	PREDICTED: berberine bridge enzyme-like 8 [Vitis vinifera]	---	1	7.34981e-10	162.93	THAQN(1)ATDIVYR	3	-0.16465	1	0.842	0.924	0.84
CSS038271.1_CSS038271	72	N	PREDICTED: berberine bridge enzyme-like 8 [Vitis vinifera]	---	1	0.000984883	117.01	FN(1)ESFTPKPK	3	0.2231	5	0.908	0.879	0.85
CSS038595.1_CSS038595	111	N	PREDICTED: probable xyloglucan endotransglucosylase/hydrolase protein 6 [Juglans regia]	---	1	2.42801e-11	176.78	DELDFEFLGN(1)R	2	-0.61942	1	0.83	0.805	0.872
CSS038824.1_CSS038824	244	N	PREDICTED: fasciclin-like arabinogalactan protein 1 [Sesamum indicum]	---	1	0.00412346	102.51	YKN(1)LTVAGK	3	0.9667	2	0.944	0.968	1.058
CSS038824.1_CSS038824	165	N	PREDICTED: fasciclin-like arabinogalactan protein 1 [Sesamum indicum]	---	1	3.13707e-05	89.358	SLDEVPYN(1)MSVIQISK	3	1.3885	2	0.92	1.068	1.044
CSS039118.1_CSS039118	354	N	DUF1680 domain protein [Medicago truncatula]	---	1	6.72357e-06	124.62	LILN(1)DSTSSEFSEPK	3	0.85297	2	0.822	0.954	0.839
CSS039118.1_CSS039118	342	N	DUF1680 domain protein [Medicago truncatula]	---	1	3.95617e-11	173.72	FPEPGTN(1)SSVR	2	0.1242	3	0.906	0.928	0.915
CSS039167.1_CSS039167	119	N	PREDICTED: LOW QUALITY PROTEIN: protein STRICTOSIDINE SYNTHASE-LIKE 5-like [Vitis vinifera]	---	1	6.82456e-28	167.89	VSVN(1)ESADDSVVENWVNTGGR	3	-0.6085	2	1.002	0.982	1.032
CSS039169.1_CSS039169	229	N	PREDICTED: protein STRICTOSIDINE SYNTHASE-LIKE 5-like [Fragaria vesca subsp. vesca]	---	1	0.00587299	72.34	LN(1)LTQHPAVAV	2	0.26555	3	1.049	1.008	1.05
CSS039322.1_CSS039322	204	N	PREDICTED: allantoinase [Citrus sinensis]	---	1	1.14434e-37	221.91	ELLTVTN(1)STR	2	0.23079	1	1.034	0.938	0.978
CSS039471.1_CSS039471	96	N	PREDICTED: peroxidase 4 [Citrus sinensis]	---	0.99483	1.38329e-05	137.78	TARPN(0.005)N(0.995)GSVR	2	2.8643	5	0.841	0.862	0.84
CSS039471.1_CSS039471	211	N	PREDICTED: peroxidase 4 [Citrus sinensis]	---	0.99994	1.09078e-09	138.19	IYN(1)ETNIDSSFAK	2	0.44061	3	0.87	0.888	0.884
CSS039472.1_CSS039472	98	N	PREDICTED: peroxidase 4-like [Eucalyptus grandis]	---	0.996899	7.97594e-06	154.15	TAGPN(0.003)N(0.997)GSVR	2	-0.37727	5	1.059	1.066	1.091
CSS039650.1_CSS039650	309	N	PREDICTED: erlin-1 [Sesamum indicum]	---	0.997233	0.000491098	103.91	FIEAITN(0.997)N(0.003)SK	2	0.11651	1
CSS039656.1_CSS039656	54	N	PREDICTED: PLASMODESMATA CALLOSE-BINDING PROTEIN 3 [Sesamum indicum]	---	0.989971	9.06473e-16	64.16	NIDYACGAGADCSAIIQN(0.99)GVCYN(0.009)PN(0.001)TVK	3	-2.1922	2	1.142	1.05	1.241
CSS040077.1_CSS040077	422	N	PREDICTED: monocopper oxidase-like protein SKU5 isoform X1 [Vitis vinifera]	---	1	2.59149e-05	110.08	VDASIIN(1)GTYK	3	-0.82772	1	0.939	0.908	0.849
CSS040135.1_CSS040135	210	N	PREDICTED: peroxidase 4-like [Vitis vinifera]	---	0.999966	1.31851e-17	152.11	IYN(1)ETNIDSSFAQTR	2	-0.84618	2	1.041	1.093	1.025
CSS040135.1_CSS040135	97	N	PREDICTED: peroxidase 4-like [Vitis vinifera]	---	0.999972	7.59303e-08	174.48	AAPNFN(1)SVR	2	0.12108	2	0.995	0.944	0.961
CSS040135.1_CSS040135	160	N	PREDICTED: peroxidase 4-like [Vitis vinifera]	---	0.999377	3.43433e-07	45.349	TASQGAAN(0.999)SSIPPPTSN(0.455)LTALVSSFN(0.545)AVGLSTK	4	-0.91894	1	1.212	1.152	0.669
CSS040354.1_CSS040354	138	N	PREDICTED: dirigent protein 22-like [Juglans regia]	---	1	5.76616e-07	154.85	YN(1)GSTLTVLGR	2	-0.30036	2	1.084	1.011	1.059
CSS040392.1_CSS040392	65	N	PREDICTED: cysteine-rich repeat secretory protein 55-like [Gossypium hirsutum]	---	0.999971	2.48323e-05	94.717	GTILNGYIN(1)TSYGK	3	-0.59825	1	1.028	0.935	0.953
CSS041042.1_CSS041042	150	N	PREDICTED: fasciclin-like arabinogalactan protein 4 [Nicotiana tabacum]	---	1	1.86002e-06	120.84	SPDSN(1)ATVLSLIK	3	-0.060592	1	1.175	1.252	1.16
CSS041553.1_CSS041553	326	N	PREDICTED: vicianin hydrolase-like [Populus euphratica]	---	1	7.91724e-09	129.37	LPN(1)FTELESQILK	2	-0.22271	2	0.8	0.876	0.886
CSS041574.1_CSS041574	87	N	PREDICTED: nicalin-1 [Vitis vinifera]	---	1	0.00600256	144.77	EVN(1)VTFIR	2	0.45936	1	0.827	0.792	0.771
CSS041574.1_CSS041574	379	N	PREDICTED: nicalin-1 [Vitis vinifera]	---	0.999999	0.00940117	107.01	IN(1)ISNTR	2	-0.71907	1	0.709	0.805	0.736
CSS041657.1_CSS041657	68	N	PREDICTED: IAA-amino acid hydrolase ILR1-like 5 isoform X1 [Nicotiana tomentosiformis]	---	1	1.19893e-07	156.14	FEEHN(1)TSALIR	3	0.47142	3	0.926	0.952	1.055
CSS042225.1_CSS042225	505	N	PREDICTED: peptide-N4-(N-acetyl-beta-glucosaminyl)asparagine amidase A [Populus euphratica]	---	1	0.00865919	93.096	N(1)YTILYDK	2	1.8696	1	1.097	1.046	1.022
CSS042406.1_CSS042406	136	N	PREDICTED: cytochrome b561 and DOMON domain-containing protein At3g25290-like [Ipomoea nil]	---	1	0.00553805	55.353	SAEYSN(1)GTMK	3	0.87226	1	0.971	1.03	1.058
CSS042406.1_CSS042406	41	N	PREDICTED: cytochrome b561 and DOMON domain-containing protein At3g25290-like [Ipomoea nil]	---	1	2.35821e-31	203.88	LYTN(1)CTDLPSLR	2	0.15158	1	1.126	1.118	1.096
CSS042602.1_CSS042602	407	N	PREDICTED: UDP-glucose:glycoprotein glucosyltransferase isoform X1 [Vitis vinifera]	---	1	6.01384e-12	149	LN(1)DSIKDEIAANQR	2	0.51738	3	0.806	0.793	0.82
CSS042725.1_CSS042725	90	N	PREDICTED: low-temperature-induced cysteine proteinase [Vitis vinifera]	---	0.998889	6.45968e-05	114.89	FIDEHN(0.001)AEN(0.999)R	3	-0.28282	3	1.086	1.083	1.139
CSS042939.1_CSS042939	281	N	PREDICTED: laccase-7 [Vitis vinifera]	---	0.827233	1.68155e-08	135.02	LAASLN(0.173)N(0.827)ASFEFNTK	3	-0.11248	1	0.71	0.706	0.738
CSS043142.1_CSS043142	61	N	PREDICTED: auxin-binding protein ABP19a-like [Nelumbo nucifera]	---	0.999867	6.25016e-28	165.17	VTVDDFVFTGLGMAAN(1)TSNIIK	3	-0.40141	3	0.901	0.863	0.912
CSS043668.1_CSS043668	104	N	PREDICTED: probable beta-D-xylosidase 6 [Juglans regia]	---	0.978558	6.92833e-14	148.26	YN(0.979)FN(0.021)AVVSQQDLEDTYQPPFR	3	-0.61706	1	1.052	0.999	1.152
CSS043715.1_CSS043715	61	N	PREDICTED: glutaredoxin-C4 [Populus euphratica]	---	1	3.04272e-17	178.67	ELN(1)QTPHVIELDQR	3	0.951	2	1.068	0.965	1.08
CSS043759.1_CSS043759	45	N	PREDICTED: subtilisin-like protease SBT5.6 [Juglans regia]	---	1	7.61417e-05	79.16	LN(1)DTEDYR	2	0.079778	2
CSS043759.1_CSS043759	580	N	PREDICTED: subtilisin-like protease SBT5.6 [Juglans regia]	---	1	0.000740764	107.79	LEGIMTVN(1)R	2	0.42208	5	0.827	0.856	0.839
CSS043830.1_CSS043830	388	N	PREDICTED: GDSL esterase/lipase At1g29670-like [Daucus carota subsp. sativus]	---	1	3.26238e-08	128.46	GQCIPNQVPCSN(1)R	2	-0.76357	2	0.855	0.917	0.945
CSS043855.1_CSS043855	117	N	PREDICTED: beta-fructofuranosidase, insoluble isoenzyme CWINV1 [Eucalyptus grandis]	---	1	0.00288652	117.4	IN(1)ASSFR	2	-0.27206	2	0.896	0.921	0.891
CSS044252.1_CSS044252	344	N	PREDICTED: putative BPI/LBP family protein At1g04970 [Juglans regia]	---	0.934642	9.3114e-05	61.942	YPNDDMN(0.065)MN(0.935)ISLSSPPDIR	3	0.80213	3	1.05	0.969	1.022
CSS044370.1_CSS044370	292	N	glycosyl transferase family 1 protein [Arabidopsis lyrata subsp. lyrata]	---	1	0.0211768	54.525	IHHVLN(1)K	3	0.31338	1	0.93	0.888	0.945
CSS044612.1_CSS044612	270	N	plant/F10M23-360 protein [Medicago truncatula]	---	1	0.000124008	106.29	FN(1)STAAWEYAR	2	-0.3677	1	0.955	0.855	1.003
CSS044612.1_CSS044612	422	N	plant/F10M23-360 protein [Medicago truncatula]	---	1	3.03459e-11	191.16	IFEEN(1)ITR	2	-0.037024	3	0.918	0.946	0.912
CSS044717.1_CSS044717	185	N	PREDICTED: protein FAR1-RELATED SEQUENCE 5-like [Malus domestica]	---	1	0.00676263	62.717	SLLN(1)MFRAIASR	2	3.81	2	1.217	1.139	1.238
CSS045037.1_CSS045037	58	N	PREDICTED: serine carboxypeptidase-like 40 [Citrus sinensis]	---	1	4.30713e-27	153.06	AANVLFLESPTGVGFSYSN(1)TTSDYVSEGDKR	4	0.13471	1	0.966	0.941	0.905
CSS045037.1_CSS045037	121	N	PREDICTED: serine carboxypeptidase-like 40 [Citrus sinensis]	---	0.993461	4.0298e-05	134.75	DPN(0.993)N(0.007)TFINLK	2	0.28071	4	0.902	0.86	0.85
CSS046616.1_CSS046616	238	N	PREDICTED: glucan endo-1,3-beta-glucosidase 6 [Prunus mume]	---	1	1.65058e-05	125.5	YPLNLGTTN(1)SGALIPAK	3	0.46506	2	0.956	0.936	0.88
CSS046616.1_CSS046616	165	N	PREDICTED: glucan endo-1,3-beta-glucosidase 6 [Prunus mume]	---	0.999569	0.00175221	117.52	N(1)ANIAYAER	2	0.75005	1	0.899	1.044	1.021
CSS046616.1_CSS046616	305	N	PREDICTED: glucan endo-1,3-beta-glucosidase 6 [Prunus mume]	---	1	0.000139694	61.11	GN(1)ISYAFN(1)SYYQR	3	0.66586	1
CSS046616.1_CSS046616	167	N	PREDICTED: glucan endo-1,3-beta-glucosidase 6 [Prunus mume]	---	0.999915	5.33614e-05	162.34	NAN(1)IAYAER	2	0.47658	1	0.954	0.988	0.957
CSS046616.1_CSS046616	299	N	PREDICTED: glucan endo-1,3-beta-glucosidase 6 [Prunus mume]	---	1	1.56393e-16	175.6	GN(1)ISYAFNSYYQR	2	-0.26758	6	0.99	0.975	1.003
CSS046635.1_CSS046635	187	N	PREDICTED: cysteine-rich receptor-like protein kinase 10 isoform X1 [Vitis vinifera]	---	1	0.0060019	70.056	EAN(1)FSSLQK	3	-0.070734	1	0.948	0.979	0.858
CSS047024.1_CSS047024	45	N	autophagy-related protein [Medicago truncatula]	---	1	1.07821e-06	114.72	LYN(1)YSLASPSPK	3	-0.22871	1	1.184	1.065	1.124
CSS047257.1_CSS047257	402	N	PREDICTED: GDSL esterase/lipase At1g54790 isoform X3 [Juglans regia]	---	1	1.97406e-05	155.48	VIN(1)GSSVTAK	2	-0.28604	1	0.912	0.891	0.907
CSS047257.1_CSS047257	350	N	PREDICTED: GDSL esterase/lipase At1g54790 isoform X3 [Juglans regia]	---	1	1.87306e-18	153.36	LQGQYTDAN(1)VTYVDIFTIK	3	0.33641	2	0.948	0.94	0.941
CSS047257.1_CSS047257	366	N	PREDICTED: GDSL esterase/lipase At1g54790 isoform X3 [Juglans regia]	---	1	3.55993e-05	165.18	SNLISN(1)YSR	2	0.67318	3	0.916	0.906	0.9
CSS047273.1_CSS047273	271	N	PREDICTED: beta-glucosidase BoGH3B-like [Malus domestica]	---	0.941676	5.18633e-13	141.6	HYLGDGGTTEGIN(0.049)EN(0.942)N(0.009)TVISR	3	0.76525	1	0.987	0.921	0.941
CSS047680.1_CSS047680	241	N	PREDICTED: ureidoglycolate hydrolase [Prunus mume]	---	0.996965	1.06361e-08	132.14	QTVDN(0.003)QN(0.997)TSFLDAAMSAGYAK	4	-0.029718	18	0.94	0.931	0.918
CSS047680.1_CSS047680	435	N	PREDICTED: ureidoglycolate hydrolase [Prunus mume]	---	1	0.00200137	109.71	ELN(1)LSHK	3	-0.076927	6	0.906	0.841	0.886
CSS048056.1_CSS048056	59	N	PREDICTED: uncharacterized membrane protein At1g75140 [Vitis vinifera]	---	1	0.00608124	148.69	N(1)LSELVSR	2	0.87212	1	0.798	0.86	0.786
CSS048344.1_CSS048344	123	N	PREDICTED: putative amidase C869.01 isoform X2 [Erythranthe guttata]	---	1	2.39146e-42	154.07	DKLN(1)TTVGSYALLGSVVAR	3	-0.47826	2	0.91	0.925	0.888
CSS048344.1_CSS048344	397	N	PREDICTED: putative amidase C869.01 isoform X2 [Erythranthe guttata]	---	0.999547	4.94613e-08	133.23	SLSDVITFNMN(1)YTDLEK	3	0.37203	2	0.953	0.885	0.852
CSS048344.1_CSS048344	434	N	PREDICTED: putative amidase C869.01 isoform X2 [Erythranthe guttata]	---	1	2.20734e-07	142.89	MAIEAIEN(1)LSR	2	-0.69045	3	0.891	0.941	0.93
CSS048349.1_CSS048349	129	N	PREDICTED: endo-1,3;1,4-beta-D-glucanase [Theobroma cacao]	---	1	0.000430594	107.09	YDLGN(1)ESAVK	2	0.81593	1	1.004	1.01	0.961
CSS048352.1_CSS048352	1179	N	PREDICTED: putative amidase C869.01 isoform X2 [Erythranthe guttata]	---	1	0.0196128	142.64	ALLN(1)LTR	2	-0.22766	1	0.736	0.768	0.761
CSS048441.1_CSS048441	456	N	PREDICTED: endoplasmin homolog [Ziziphus jujuba]	---	1	9.04543e-12	95.98	GLVDSDTLPLN(1)VSR	3	-0.055198	1
CSS048990.1_CSS048990	135	N	thioredoxin protein [Medicago truncatula]	---	0.987205	0.000764522	53.861	QQEEFYN(0.013)QQTFN(0.987)MSR	3	-0.60267	2	1.059	0.956	1.007
CSS049073.1_CSS049073	64	N	PREDICTED: purple acid phosphatase 3 [Vitis vinifera]	---	0.955723	0.000223256	60.55	GN(0.044)YN(0.956)QSQVALQMGK	3	2.9068	3	0.987	0.855	0.924
CSS049173.1_CSS049173	692	N	PREDICTED: serine/threonine-protein phosphatase 6 regulatory subunit 2 isoform X1 [Vitis vinifera]	---	0.997284	3.89749e-05	54.66	ETSDSVEPSDTDKPSVLPN(0.997)GELQVESEN(0.003)R	3	0.98549	1	1.176	1.278	0.995
CSS049282.1_CSS049282	244	N	PREDICTED: beta-glucosidase BoGH3B-like isoform X2 [Ziziphus jujuba]	---	0.996225	1.04142e-07	131.32	GIN(0.003)EN(0.996)N(0.001)TVIDFR	2	0.18733	1	0.881	0.937	0.881
CSS049484.1_CSS049484	255	N	PREDICTED: alpha-L-fucosidase 1-like [Ziziphus jujuba]	---	1	7.59756e-27	165.3	TSLSIGN(1)ASIVNYLNTGDPK	3	0.74726	1	0.795	0.984	0.908
CSS049532.1_CSS049532	130	N	PREDICTED: glyceraldehyde-3-phosphate dehydrogenase, cytosolic [Ricinus communis]	---	1	0.000121139	40.614	GILGFTEDDVVSTN(1)FIGDSR	3	1.7024	1
CSS049561.1_CSS049561	245	N	PREDICTED: endoplasmic reticulum-Golgi intermediate compartment protein 3 isoform X2 [Jatropha curcas]	---	1	0.00201378	95.358	DTFN(1)ISHK	3	-0.32339	1	0.728	0.706	0.68
CSS049795.1_CSS049795	106	N	plastocyanin-like domain-containing family protein [Populus trichocarpa]	---	1	0.000682171	132.25	DVVPLN(1)VTR	2	-0.43888	2	1.028	1.023	1.032
CSS049795.1_CSS049795	78	N	plastocyanin-like domain-containing family protein [Populus trichocarpa]	---	0.999967	0.00520141	56.404	NQMNVLEVN(1)K	3	0.59486	1	1.075	1.161	0.907
CSS049824.1_CSS049824	315	N	PREDICTED: probable LRR receptor-like serine/threonine-protein kinase At2g16250 [Vitis vinifera]	---	1	0.00370743	123.5	LLN(1)VSSNK	2	0.0070761	1	1.037	1.05	1.057
CSS050278.1_CSS050278	328	N	PREDICTED: alpha-mannosidase [Juglans regia]	---	0.996479	0.000671235	73.499	N(0.004)AEN(0.996)VSWPLK	3	2.6407	2
CSS050278.1_CSS050278	151	N	PREDICTED: alpha-mannosidase [Juglans regia]	---	0.999987	0.00370998	114.64	NQFN(1)ITPR	2	-0.42173	2	0.839	0.888	0.852
CSS050278.1_CSS050278	270	N	PREDICTED: alpha-mannosidase [Juglans regia]	---	1	5.21289e-23	174.78	VNDVINAAITQAN(1)VTR	3	-0.38212	1	0.976	0.772	0.727
CSS050876.1_CSS050876	437	N	receptor-like protein 12 [Aegilops tauschii subsp. tauschii]	---	1	2.13478e-05	87.447	LSN(1)LTGQIPSAITK	2	0.25414	2	1.007	0.908	0.936
CSS050876.1_CSS050876	547	N	receptor-like protein 12 [Aegilops tauschii subsp. tauschii]	---	0.999999	1.07847e-59	233.4	SLGNLN(1)FTVVDFSR	2	-0.36616	9	1.022	1.01	0.999
CSS050876.1_CSS050876	239	N	receptor-like protein 12 [Aegilops tauschii subsp. tauschii]	---	1	9.99236e-19	162.59	NQLSGDLSFIFGSN(1)K	3	0.10974	7	1.007	0.996	1.002
CSS050876.1_CSS050876	226	N	receptor-like protein 12 [Aegilops tauschii subsp. tauschii]	---	1	3.8201e-11	85.493	N(1)QLSGDLSFIFGSN(1)K	3	4.4247	1
CSS051187.1_CSS051187	81	N	PREDICTED: cysteine-rich repeat secretory protein 12 [Ipomoea nil]	---	1	5.45125e-08	132.64	VSVPGSGPN(1)DTVYGLFQCR	3	0.62072	1	1.202	1.11	0.968
CSS051187.1_CSS051187	133	N	PREDICTED: cysteine-rich repeat secretory protein 12 [Ipomoea nil]	---	1	1.31347e-06	123.29	YDN(1)TSFLGVEDK	2	0.35687	2	0.989	0.96	0.978
CSS051286.1_CSS051286	271	N	electron transporter, putative [Medicago truncatula]	---	1	3.05722e-09	73.953	N(1)MSPTVGISCSFEQFQR	3	-0.10914	1
CSS051286.1_CSS051286	643	N	electron transporter, putative [Medicago truncatula]	---	1	0.000153614	98.898	AN(1)LSEEIHFK	3	2.4748	2	0.807	0.758	0.829
CSS051547.1_CSS051547	272	N	PREDICTED: multiple inositol polyphosphate phosphatase 1 [Vitis vinifera]	---	1	5.56393e-09	169.89	EEASLLN(1)ITDR	2	0.64864	1	0.948	0.934	0.907
CSS051811.1_CSS051811	39	N	PREDICTED: photosystem I reaction center subunit VI-2, chloroplastic-like [Vigna angularis]	---	0.999948	4.10838e-12	76.002	SVYFDLEDLGN(1)TTGQWDLYGSDAPSPYNSLQSK	4	1.3623	1	1.03	1.009	1.121
CSS051826.1_CSS051826	377	N	At2g47010/F14M4.16 [Arabidopsis lyrata subsp. lyrata]	---	0.904274	0.00111933	51.876	N(0.904)DTAN(0.096)FPYSAYHYYCAPGNAR	3	0.13981	1
CSS051893.1_CSS051893	270	N	PREDICTED: glycerophosphodiester phosphodiesterase GDPD6 [Prunus mume]	---	1	2.69414e-05	111.11	QPAFIQSFAPTSLTYVSN(1)QTDLPK	4	0.67782	2	1.036	1	0.898
CSS052009.1_CSS052009	209	N	PREDICTED: peroxidase 72-like [Nelumbo nucifera]	---	0.995574	0.00125879	81.713	LYN(0.996)QSGN(0.004)GLADMTLDK	3	1.8537	2	1.007	0.914	0.858
CSS052036.1_CSS052036	188	N	PREDICTED: protein disulfide-isomerase [Nelumbo nucifera]	---	1	4.59911e-16	144.57	FEN(1)FTALTEK	3	0.44494	19	0.828	0.816	0.811
CSS052214.1_CSS052214	174	N	PREDICTED: probable receptor protein kinase TMK1 [Nicotiana sylvestris]	---	1	4.30928e-05	121.51	DASTLQVFSAVSAN(1)ITGK	3	0.51349	2	1.087	1.018	1.054
CSS052214.1_CSS052214	292	N	PREDICTED: probable receptor protein kinase TMK1 [Nicotiana sylvestris]	---	0.999634	1.40725e-17	151.56	VVN(1)LTNNQLQGPTPK	3	-0.13198	6	1.052	1.004	1.047
CSS052389.1_CSS052389	198	N	PREDICTED: Niemann-Pick C1 protein-like [Nelumbo nucifera]	---	1	0.00608442	87.942	DYN(1)YSSESR	2	-0.8989	1	0.939	0.933	0.938
CSS052669.1_CSS052669	267	N	PREDICTED: wall-associated receptor kinase-like 1 [Prunus mume]	---	1	0.00362599	107.57	AASVASFN(1)R	2	-0.13509	1	0.674	0.718	0.695
CSS052680.1_CSS052680	103	N	PREDICTED: fasciclin-like arabinogalactan protein 7 [Vitis vinifera]	---	1	7.44246e-07	117.79	STLSN(1)LTQDQLK	3	0.22269	1	1.036	1.022	1.111
CSS052719.1_CSS052719	87	N	PREDICTED: probable leucine-rich repeat receptor-like protein kinase At5g49770 [Ricinus communis]	---	1	0.0178036	85.67	SIGN(1)LTK	2	0.64785	1	0.838	0.844	0.926
CSS052857.1_CSS052857	90	N	PREDICTED: thaumatin-like protein [Sesamum indicum]	---	0.877571	1.65204e-07	99.219	TNCNFDAN(0.001)GN(0.122)GQCQTGDCN(0.878)GLLQCQGYGK	4	-0.80246	3	1.191	1.19	1.229
CSS053030.1_CSS053030	150	N	PREDICTED: heparanase-like protein 3 [Vitis vinifera]	---	0.970923	0.0144692	42.718	WDELN(0.029)AFFN(0.971)K	2	0.49777	1
CSS053238.1_CSS053238	347	N	PREDICTED: aminoacylase-1 isoform X2 [Vitis vinifera]	---	1	0.00811292	108.74	N(1)MTFEFK	2	0.7089	5	0.889	0.928	0.906
CSS053404.1_CSS053404	196	N	PREDICTED: transcription factor DIVARICATA-like [Juglans regia]	---	0.999896	0.0202937	62.463	LN(1)SMNRDRR	2	-3.4362	1	0.856	0.759	0.743
CSS053500.1_CSS053500	107	N	PREDICTED: oxygen-evolving enhancer protein 3-2, chloroplastic [Pyrus x bretschneideri]	---	1	0.000263742	107.41	VGPPPPPSGGLPGTLN(1)ADEAR	3	0.99989	2
